# Supplementary material
Source: PubMed Central journal article supplement (PMC5919098)
Supplement: NIHMS77397-supplement-Supplemental_figures.pdf [file NIHMS77397-supplement-Supplemental_figures.pdf]

**A STEP 1**Flanking window size (bp) 

FPR1

(gene) FPR1 (ENSG00000171051.7, formyl peptide receptor 1 [Source:HGNC Symbol;Acc:HGNC:3826], FPR1, OTTHUMG00000183500.2)  
 (transcript) FPR1-001 (ENST00000304748.4, OTTHUMT00000466906.1, FPR1-001)  
 (transcript) FPR1-002 (ENST00000600815.1, FPR1-002, OTTHUMT00000466907.1)  
 (transcript) FPR1-003 (ENST00000595042.4, OTTHUMT00000466905.1, FPR1-003)  
 (transcript) FPR1-004 (ENST00000594900.1, OTTHUMT00000466954.1, FPR1-004)

**B STEP 2**

- native cell (CL:0000003)
- eukaryotic cell (CL:0000255)
  - animal cell (CL:0000548)
    - hematopoietic cell (CL:0000988)
      - myeloid cell (CL:0000763)
        - erythroid lineage cell (CL:0000764)
          - megakaryocyte-erythroid progenitor cell (CL:0000050)
          - megakaryocyte (CL:0000556)
          - granulocyte monocyte progenitor cell (CL:0000557)
        - blood cell (CL:0000081)
          - granulocyte (CL:0000094)
            - neutrophil (CL:0000775)
              - immature neutrophil (CL:0000776)
                - neutrophilic myelocyte (CL:0000580)
                - neutrophilic metamyelocyte (CL:0000582)
              - eosinophil (CL:0000771)
            - hematopoietic precursor cell (CL:0008001)
          - epithelial cell (CL:0000066)
        - circulating cell (CL:0000080)
        - precursor cell (CL:0011115)
          - stem cell (CL:0000034)
        - motile cell (CL:0000219)
          - leukocyte (CL:0000738)
            - nongranular leukocyte (CL:0002087)
              - lymphocyte (CL:0000542)
                - lymphocyte of B lineage (CL:0000945)
                  - T cell (CL:0000084)
                    - alpha-beta T cell (CL:0000789)
                    - immature T cell (CL:0002420)
                    - mature T cell (CL:0002419)
                  - natural killer cell (CL:0000623)
                - dendritic cell (CL:0000451)
                - myeloid leukocyte (CL:0000766)
              - phagocyte (CL:0000234)
                - mature neutrophil (CL:0000096)
                  - band form neutrophil (CL:0000560)
                  - segmented neutrophil of bone marrow (CL:0011114)
                - classical monocyte (CL:0000860)
                - macrophage (CL:0000235)
            - nucleate cell (CL:0002242)

**C STEP 3**

- Methylated regions mean series
- Hyper-methylated regions mean series
- Hypo-methylated regions mean series
- Gene Expression
- Gene Expression pairwise t-test comparisons
- Transcript Expression
- Transcript Expression pairwise t-test comparisons
- Regulatory regions (DNaseI) mean series
- Narrow Histone Peaks H2A.Zac mean series
- Narrow Histone Peaks H3K27ac mean series
- Broad Histone Peaks H3K27me3 mean series
- Broad Histone Peaks H3K36me3 mean series
- Broad Histone Peaks H3K4me1 mean series
- Narrow Histone Peaks H3K4me3 mean series
- Broad Histone Peaks H3K9me3 mean series

 Initially show mean series of whole data set

Filter by healthy / disease status

 normal

Please, (de)select the initial charts you are interested in, and press

Go!

Please, select above the cellular types you are interested in, and press

Continue

**Figure S2.- A view of results displayed by BDAP for FPR1 gene. Related to STAR Methods.**

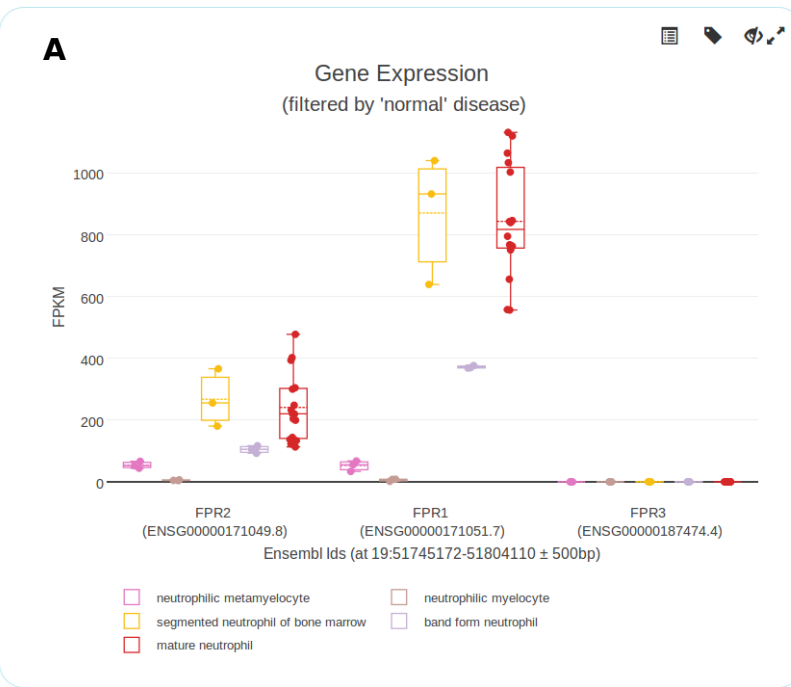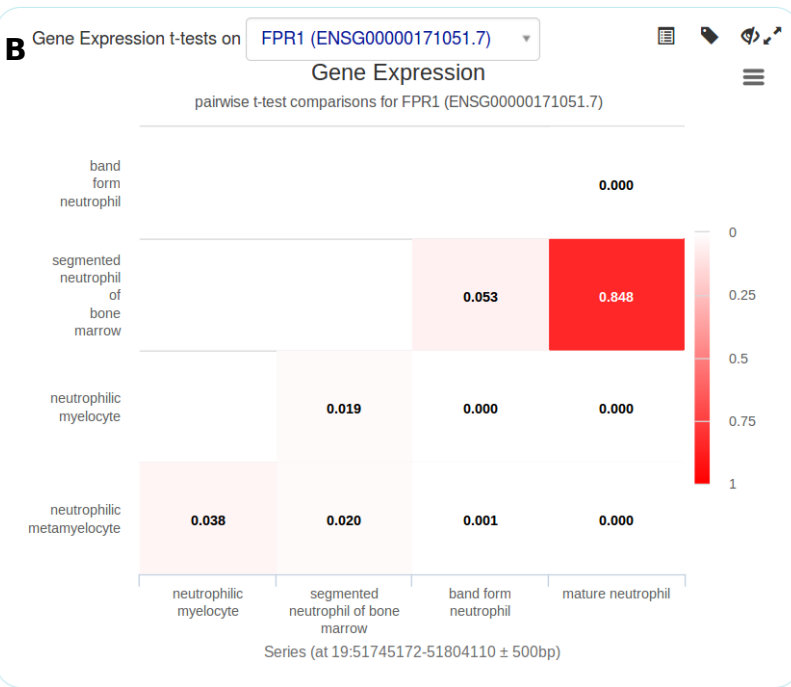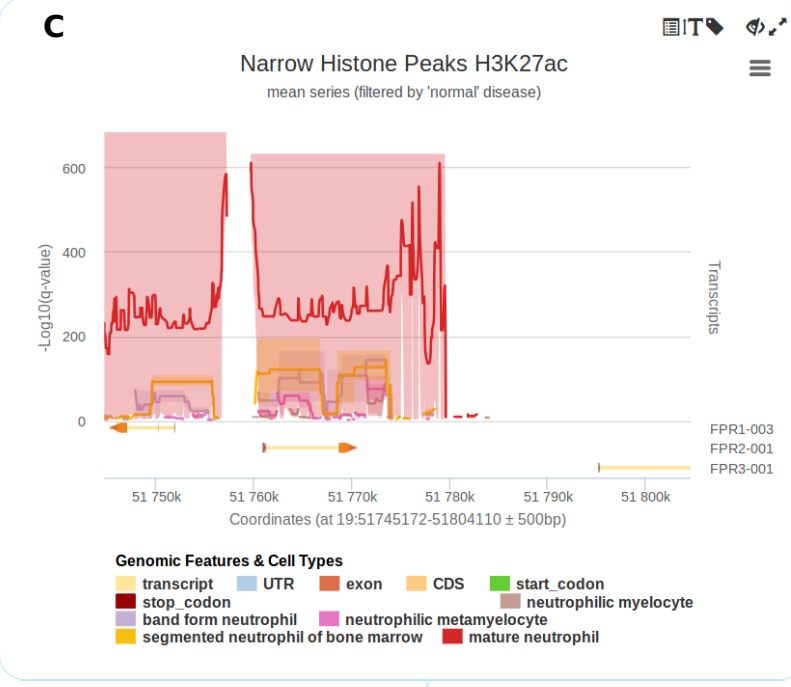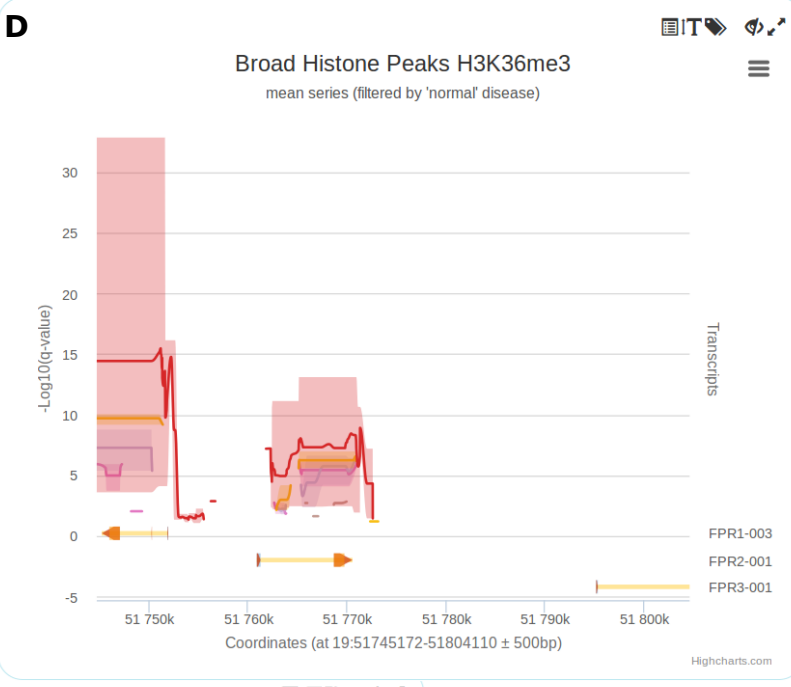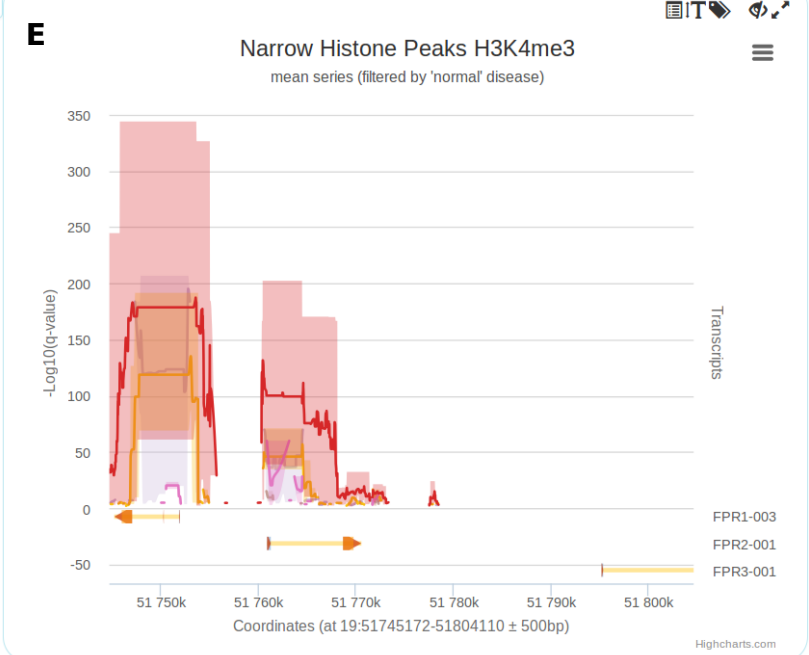

**Figure S3.- A practical BLUEPRINT Data Analysis Portal usage case with IRF8 gene. Related to STAR Methods.**

**A STEP 1**

Flanking window size (bp)

IRF8

(gene) IRF8 (ENSG00000140968.9, Interferon regulatory factor 8 [Source:HGNC Symbol;Acc:HGNC:5358], IRF8, OTTHUMG00000137648.7)  
 (transcript) IRF8-001 (ENST00000268638.8, OTTHUMT00000269100.2, IRF8-001)  
 (transcript) IRF8-002 (ENST00000563180.1, OTTHUMT00000430846.2, IRF8-002)  
 (transcript) IRF8-003 (ENST00000566369.1, OTTHUMT00000430847.1, IRF8-003)  
 (transcript) IRF8-004 (ENST00000565552.1, IRF8-004, OTTHUMT00000430856.1)

**B STEP 2**

- native cell (CL:0000003)
- eukaryotic cell (CL:0000255)
  - animal cell (CL:0000548)
    - hematopoietic cell (CL:0000988)
      - myeloid cell (CL:0000763)
        - blood cell (CL:0000081)
          - granulocyte (CL:0000094)
            - neutrophil (CL:0000775)
              - immature neutrophil (CL:0000776)
                - neutrophilic myelocyte (CL:0000580)
                - neutrophilic metamyelocyte (CL:0000582)
              - eosinophil (CL:0000771)
            - hematopoietic precursor cell (CL:0008001)
          - epithelial cell (CL:0000066)
        - circulating cell (CL:0000080)
        - precursor cell (CL:0011115)
        - motile cell (CL:0000219)
          - leukocyte (CL:0000738)
            - nongranular leukocyte (CL:0002087)
              - lymphocyte (CL:0000542)
              - dendritic cell (CL:0000451)
              - myeloid leukocyte (CL:0000766)
            - phagocyte (CL:0000234)
              - mature neutrophil (CL:0000096)
              - classical monocyte (CL:0000860)
                - CD14-positive, CD16-negative classical monocyte (CL:0002057)
              - macrophage (CL:0000235)
                - elicited macrophage (CL:0000861)
      - nucleate cell (CL:0002242)
        - single nucleate cell (CL:0000226)
          - mononuclear cell (CL:0000842)

Please, select above the cellular types you are interested in, and press

**C STEP 3**

- Methylated regions mean series
- Hyper-methylated regions mean series
- Hypo-methylated regions mean series
- Gene Expression
- Gene Expression pairwise t-test comparisons
- Transcript Expression
- Transcript Expression pairwise t-test comparisons
- Regulatory regions (DNaseI) mean series
- Narrow Histone Peaks H3K27ac mean series
- Broad Histone Peaks H3K27me3 mean series
- Broad Histone Peaks H3K36me3 mean series
- Broad Histone Peaks H3K4me1 mean series
- Narrow Histone Peaks H3K4me3 mean series
- Narrow Histone Peaks H3K9/14ac mean series
- Broad Histone Peaks H3K9me3 mean series

Initially show mean series of whole data set

Filter by healthy / disease status

normal

Please, (de)select the initial charts you are interested in, and press

**Figure S4.- A view of results displayed by BDAP for IRF8 gene. Related to STAR Methods.**

**A**

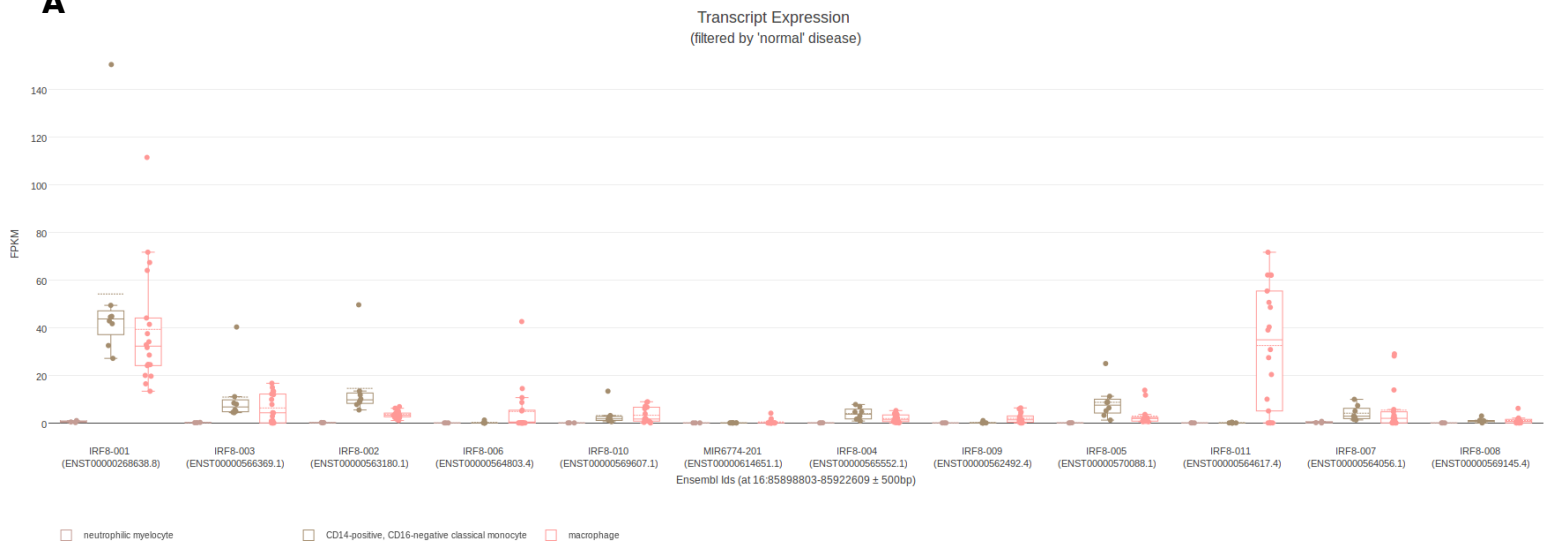

**B**

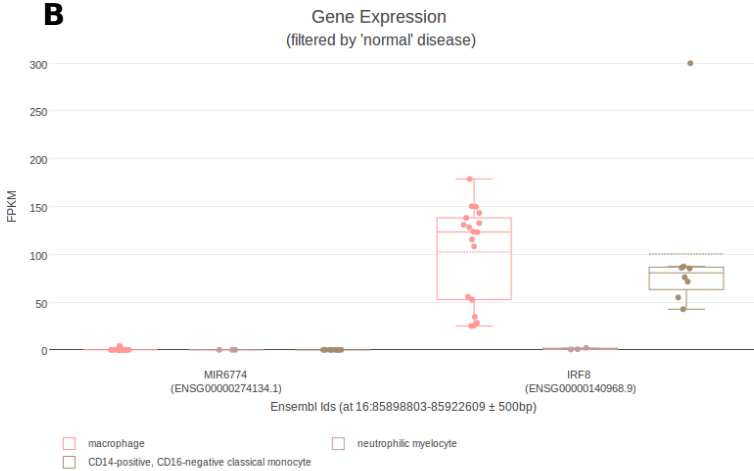

**C**

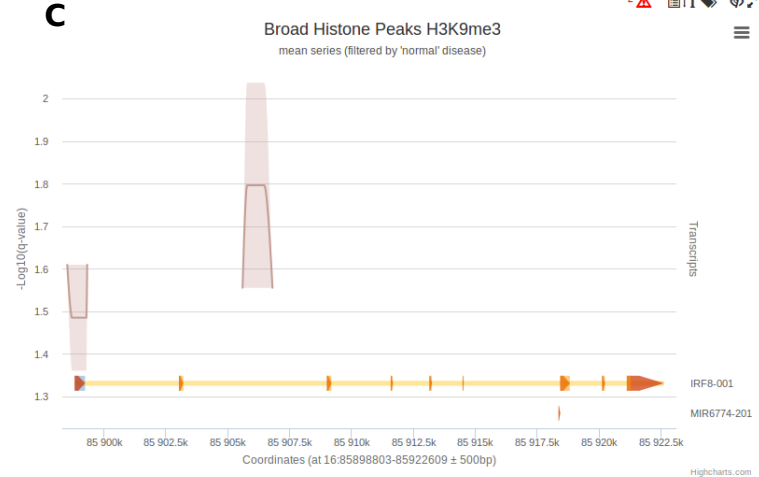

**D**

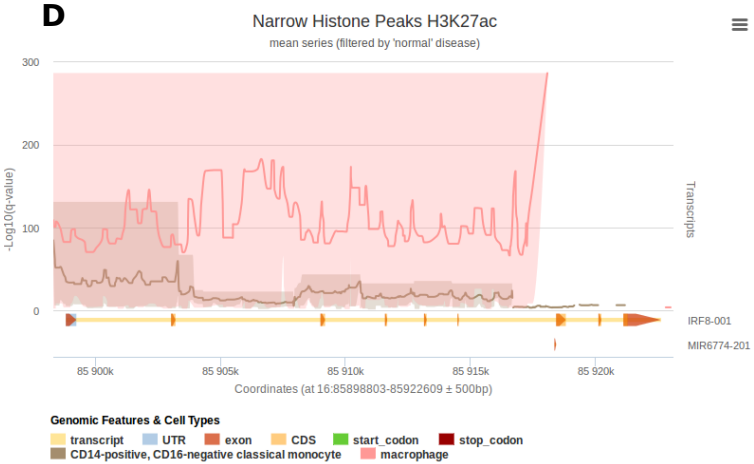

**E**

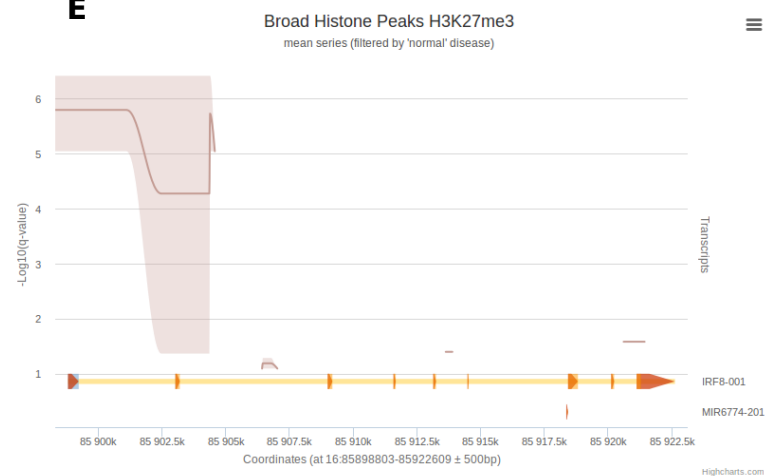

## Supplemental figure legends

### **Figure S1.- A practical BLUEPRINT Data Analysis Portal usage case with FPR1 gene. Related to STAR Methods.**

- A. Step one. Introduce the FPR1 gene symbol in the search-box and select 500 bp for flanking window.
- B. Step two. Select those cell types of interest based on the cell ontology hierarchy: neutrophilic myelocyte; neutrophilic metamyelocyte; band form neutrophil; segmented neutrophil of bone marrow; and mature neutrophil (shaded in red).
- C. Step three. Select the available experiments of interests (ticked in green) and the healthy or disease filtering.

See also Figure 1.

### **Figure S2.- A view of results displayed by BDAP for FPR1 gene. Related to STAR Methods.**

- A. Gene expression boxplots. (Top left)
- B. Heatmap with pairwise t-test comparisons for FPR1. (Top right)
- C. Histone H3K27ac spline+ribbon-based scatter plots. (Middle left)
- D. Histone H3K36me3 spline+ribbon-based scatter plots. (Middle right)
- E. Histone H3K4me3 spline+ribbon-based scatter plots. (Bottom center)

The graphical representation of the genes in the bottom of the spline+ribbon-based scatter plots are based on the principal splicing isoform described in APPRIS (Rodriguez et al, 2013).

See also Figure 1.

### **Figure S3.- A practical BLUEPRINT Data Analysis Portal usage case with IRF8 gene. Related to STAR Methods.**

- A. Step one. Introduce the IRF8 gene symbol in the search-box and select 500 bp for flanking window.
- B. Step two. Select those cell types of interest based on the cell ontology hierarchy: neutrophilic myelocyte, the classical monocyte and the macrophages (shaded in red).
- C. Step three. Select the available experiments of interests (ticked in green) and the healthy or disease filtering.

See also Figure 1.

### **Figure S4.- A view of results displayed by BDAP for IRF8 gene. Related to STAR Methods.**

- A. Transcripts expression boxplot. (Top left)
- B. Gene Expression boxplot. (Middle left)
- C. Histone H3K9me3 spline+ribbon-based scatter plots. (Middle right)
- D. Histone H3K27ac spline+ribbon-based scatter plots. (Bottom left)
- E. Histone H3K27me3 spline+ribbon-based scatter plots. (Bottom right)

The graphical representation of the genes in the bottom of the spline+ribbon-based scatter

plots are based on the principal splicing isoform described in APPRIS (Rodriguez et al, 2013).

See also Figure 1.

### **Supplemental table legends**

**Table S1. Table with comparison between epigenomic resources for large epigenome data access (In Table\_S1.xls)**
